# Supplementary material for: Loss of heterozygosity of essential genes represents a widespread class of potential cancer vulnerabilities
Source: PubMed Central journal article supplement (PMC7239950; doi:10.1038/s41467-020-16399-y), 2020-05-20
Supplement: 41467_2020_16399_MOESM2_ESM.pdf [file 41467_2020_16399_MOESM2_ESM.pdf]

## Description of Additional Supplementary Files

Supplementary Data 1: Cell-essential genes.

Supplementary Data 2: DAVID Biological Process GO Term enrichment analysis for cell-essential genes.

Supplementary Data 3: GEMINI vulnerabilities.

Supplementary Data 4: DAVID Biological Process GO Term enrichment analysis for GEMINI genes.

Supplementary Data 5: Annotation of protein-altering GEMINI vulnerabilities.
